# Supplementary material for: WITHDRAWN: Mitochondrial accumulation induced axon dysfunction promotes paranode instability and demyelination in hypoxic-ischemic forms of demyelination
Source: Research Square preprint supplement (doi:10.21203/rs.3.rs-102169/v1), 2020-11-14
Supplement: Supplementary file 1 [file 3c86db192c2075b03950f717.xlsx]

## Sheet: Fig1 b
Axon Diameter	Sham	BCAS 7d	BCAS 28d
0.171		0.467781
0.188		0.433846
0.189		0.444126
0.197		0.481793
0.205		0.399351
0.21		0.444706
0.223		0.565352
0.223		0.568555
0.244		0.507159
0.249		0.577578
0.255		0.549043
0.276		0.537663
0.281		0.510909
0.291		0.53668
0.296		0.510345
0.298		0.574304
0.302		0.647143
0.312		0.567273
0.316		0.487822
0.317		0.563834
0.323		0.502072
0.324		0.580876
0.355		0.585165
0.37		0.646602
0.373		0.653113
0.379		0.424782
0.386		0.664245
0.388		0.695617
0.391		0.7038
0.394		0.643558
0.399		0.655292
0.401		0.61587
0.417		0.644846
0.42		0.542324
0.427		0.588515
0.447		0.727486
0.452		0.654019
0.452		0.661463
0.456		0.754412
0.462		0.690698
0.464		0.651482
0.47		0.675719
0.484		0.661001
0.493		0.64026
0.503		0.653247
0.504		0.648927
0.506		0.685843
0.51		0.654779
0.51		0.659483
0.531		0.614267
0.554		0.673784
0.555		0.667781
0.555		0.67683
0.642		0.715985
0.67		0.701979
0.675		0.760325
0.707		0.652615
0.71		0.760714
0.722		0.726845
0.723		0.704984
0.725		0.749139
0.726		0.73664
0.748		0.758108
0.776		0.700502
0.785		0.733645
0.819		0.76542
0.856		0.709393
0.856		0.754555
0.896		0.703051
0.922		0.751631
0.93		0.698665
0.932		0.734501
1.079		0.624101
1.195		0.744806
1.234		0.750913
1.276		0.749608
1.385		0.768022
1.442		0.790377
1.449		0.784185
1.496		0.76197
1.857		0.789094
0.215	0.570292
0.251	0.526205
0.255	0.45053
0.272	0.564315
0.274	0.61991
0.28	0.4375
0.289	0.574553
0.291	0.573964
0.305	0.54078
0.321	0.560209
0.327	0.509346
0.327	0.502304
0.335	0.593972
0.335	0.611314
0.341	0.516667
0.342	0.511211
0.354	0.55748
0.356	0.532934
0.381	0.604762
0.383	0.625817
0.395	0.692982
0.396	0.630573
0.397	0.763462
0.426	0.6816
0.427	0.583333
0.433	0.648204
0.442	0.690625
0.443	0.601085
0.443	0.650514
0.45	0.576184
0.458	0.820789
0.458	0.589447
0.484	0.622108
0.488	0.710335
0.488	0.724036
0.493	0.74359
0.518	0.66581
0.521	0.68643
0.521	0.694667
0.529	0.645122
0.55	0.696203
0.552	0.720627
0.556	0.70648
0.564	0.569697
0.569	0.662398
0.572	0.67215
0.58	0.781671
0.58	0.721393
0.585	0.659526
0.625	0.710227
0.625	0.732708
0.642	0.758865
0.658	0.694093
0.67	0.656219
0.678	0.791132
0.688	0.716667
0.767	0.680568
0.824	0.575821
0.869	0.791439
0.872	0.751077
0.892	0.768966
0.922	0.779374
0.96	0.768
0.992	0.742515
1.012	0.788162
1.043	0.75036
1.079	0.841654
1.081	0.797198
1.183	0.782407
1.213	0.790228
1.233	0.783853
1.234	0.810243
1.234	0.762199
1.561	0.820715
1.591	0.854917
1.592	0.786173
1.72	0.821002
0.247			0.815182
0.257			0.725989
0.257			0.658974
0.267			0.689922
0.282			0.646789
0.287			0.652273
0.291		0.715435	0.603734
0.291			0.60625
0.301			0.640426
0.304			0.718676
0.31			0.761671
0.315			0.637652
0.344			0.744589
0.354			0.766234
0.354			0.753191
0.357			0.767742
0.36			0.810811
0.37			0.755102
0.372			0.855172
0.379			0.695413
0.384			0.747082
0.396			0.770428
0.399			0.814286
0.406			0.779271
0.411			0.820359
0.418			0.799235
0.421			0.753131
0.439			0.676425
0.449			0.720706
0.452			0.762226
0.452			0.935818
0.456			0.715856
0.46			0.699088
0.47			0.669516
0.47			0.814558
0.478			0.774716
0.482			0.866906
0.484			0.764613
0.492			0.779715
0.508			0.777948
0.531			0.700528
0.544			0.798825
0.55			0.844854
0.558			0.739073
0.559			0.767857
0.589			0.84505
0.591			0.763566
0.591			0.797571
0.593			0.853237
0.596			0.770026
0.617			0.877667
0.617			0.825971
0.62			0.90379
0.655			0.876841
0.664			0.841572
0.666			0.870588
0.692			0.878173
0.695			0.765419
0.708			0.857143
0.709			0.806598
0.741			0.908088
0.747			0.829079
0.755			0.818872
0.77			0.833333
0.775			0.823592
0.789			0.819315
0.798			0.947743
0.824			0.8357
0.919			0.826439
0.96			0.775444
0.984			0.836735
1.026			0.904762
1.034			0.816746
1.04			0.888889
1.165			0.864885
1.165			0.873313
1.176			0.860278
1.213			0.870158
1.315			0.920224
1.388			0.910761
1.677			0.863988

## Sheet: Fig1 c
Sham	BCAS 7d	BCAS 28d
0.4375	0.430411	0.603734
0.45053	0.457821	0.60625
0.502304	0.467589	0.637652
0.509346	0.478669	0.640426
0.511211	0.479294	0.646789
0.516667	0.504164	0.652273
0.526205	0.519266	0.658974
0.532934	0.525763	0.669516
0.54078	0.541122	0.676425
0.55748	0.546605	0.689922
0.560209	0.550039	0.695413
0.564315	0.550647	0.699088
0.569697	0.578422	0.700528
0.570292	0.579481	0.715856
0.573964	0.584505	0.718676
0.574553	0.591747	0.720706
0.575821	0.607688	0.725989
0.576184	0.609324	0.739073
0.583333	0.611394	0.744589
0.589447	0.612776	0.747082
0.593972	0.618973	0.753131
0.601085	0.6225	0.753191
0.604762	0.626055	0.755102
0.611314	0.630678	0.761671
0.61991	0.634288	0.762226
0.622108	0.662043	0.763566
0.625817	0.663771	0.764613
0.630573	0.672642	0.765419
0.645122	0.690058	0.766234
0.648204	0.693612	0.767742
0.650514	0.695	0.767857
0.656219	0.696894	0.770026
0.659526	0.697477	0.770428
0.662398	0.699399	0.774716
0.66581	0.702153	0.775444
0.67215	0.703374	0.777948
0.680568	0.703911	0.779271
0.6816	0.704055	0.779715
0.68643	0.704887	0.797571
0.690625	0.705706	0.798825
0.692982	0.706259	0.799235
0.694093	0.710776	0.806598
0.694667	0.712413	0.810811
0.696203	0.71291	0.814286
0.70648	0.715909	0.814558
0.710227	0.71972	0.815182
0.710335	0.72619	0.816746
0.716667	0.728275	0.818872
0.720627	0.729472	0.819315
0.721393	0.739187	0.820359
0.724036	0.744419	0.823592
0.732708	0.749721	0.825971
0.742515	0.753005	0.826439
0.74359	0.754985	0.829079
0.75036	0.756578	0.833333
0.751077	0.757733	0.8357
0.758865	0.75854	0.836735
0.762199	0.759816	0.841572
0.763462	0.764568	0.844854
0.768	0.771673	0.84505
0.768966	0.783378	0.853237
0.779374	0.784068	0.855172
0.781671	0.790706	0.857143
0.782407	0.791629	0.860278
0.783853	0.793934	0.863988
0.786173	0.802735	0.864885
0.788162	0.807406	0.866906
0.790228	0.807911	0.870158
0.791132	0.809318	0.870588
0.791439	0.810091	0.873313
0.797198	0.813088	0.876841
0.810243	0.813242	0.877667
0.820715	0.817072	0.878173
0.820789	0.819462	0.888889
0.821002	0.819881	0.90379
0.841654	0.821234	0.904762
0.854917	0.824953	0.908088
0.851851	0.827757	0.910761
0.947743	0.845177	0.920224
0.810091	0.850468	0.935818

## Sheet: Fig1 d
Sham	BCAS 7d	BCAS 28d
0.081826	0.092991	0.154323
0.07901	0.074393	0.183365
0.064325	0.083692	0.142662
0.080231	0.120889	0.135507
0.068147	0.130188	0.140049
0.063326	0.097898	0.126229
0.064938	0.090877	0.125536
0.065744	0.078128	0.086239
0.066548	0.109912	0.087438
0.065339	0.076508	0.093146
0.067756	0.075627	0.097906
0.083874	0.111516	0.109807
0.072176	0.083824	0.116233
0.077007	0.082066	0.11433
0.027897	0.09612	0.115034
0.046496	0.082057	0.137646
0.055795	0.06932	0.112424
0.074393	0.094224	0.12052
0.027897	0.074442	0.114099
0.055795	0.060824	0.103612

## Sheet: Fig1 e
Sham	BCAS 7d	BCAS 28d
0.49	0.844	0.732
0.88	0.57	1.195
0.253	0.558
0.183	0.558	0.996
0.547	0.397	0.712
0.513	0.593	1.09
0.231	1.082	0.713
0.41	0.716	0.564
0.339	0.211	0.502
0.328	0.872	0.531
0.769	0.431	0.531
0.671	0.769	0.563
0.5	0.824	0.494
0.543	0.397	0.598
0.35	0.475	1.013
0.733	0.692	0.407
0.435	0.611	0.497
0.311	0.647	0.529
0.297	0.345	0.643
0.374	0.363	0.736
0.378	0.261	0.939
0.474	1.101	0.62
0.393	0.616	0.536
0.438	0.694	0.511
0.442	0.642	0.558
0.97	0.56	0.409
0.242	0.517	0.46
0.498	0.604	0.477
0.435	0.686	0.757
0.521	0.329	0.518
0.616	0.328	0.844
0.36	0.466	0.651
0.602	0.498	0.755
0.442	0.623	0.768
0.449	0.86	0.629
0.477	0.546	0.443
0.389	0.522	1.177
0.901	0.306	0.728
0.556	0.517	0.605
0.507	0.443	0.64
0.188	0.541	0.407
0.163	0.615	0.477
0.342	0.369	0.804
0.322	0.558	0.924
0.334	0.482	0.393
0.688	0.674	0.424
0.543	0.447	0.622
0.21	0.364	0.778
0.198	0.644	0.856
0.314	0.355	1.238

## Sheet: Fig1 f
Sham	BCAS 7d	BCAS 28d
0.293	0.6072	0.13284
0.371	0.2645	0.15129
0.261	0.27485	0.21156
0.169	0.54855	0.26691
0.261	0.35075	0.28167
0.273	0.35305	0.13407
0.229	0.34155	0.15006
0.243	0.40135	0.17466
0.298	0.2185	0.13284
0.256	0.1794	0.24231
0.214	0.41975	0.29397
0.239	0.3128	0.18573
0.224	0.30245	0.13407
0.223	0.64055	0.18942
0.302	0.3128	0.22878
0.211	0.2967	0.18696
0.438	0.32545	0.23001
0.131	0.31855	0.12054
0.337	0.3013	0.17466
0.148	0.15065	0.18819
0.166	0.3128	0.20418
0.145	0.2967	0.20418
0.217	0.437	0.25953
0.471	0.39445	0.26322
0.163	0.15065	0.123
0.232	0.2392	0.25584
0.566	0.29785	0.24231
0.196	0.33695	0.13407
0.37	0.37145	0.23616
0.186	0.38065	0.09471
0.406	0.4186	0.15621
0.423	0.39215	0.20049
0.224	0.31625	0.17589
0.178	0.35535	0.18819
0.146	0.31855	0.17589
0.327	0.35995	0.27798
0.275	0.368	0.26691
0.2	0.2668	0.20049
0.368	0.3473	0.17589
0.284	0.24725	0.18573
0.253	0.46115	0.18204
0.247	0.2162	0.26322
0.26	0.29095	0.25953
0.409	0.368	0.26322
0.441	0.322	0.25707
0.322	0.50715	0.20049
0.29	0.40825	0.24108
0.207	0.21275	0.22755
0.226	0.35995	0.1968
0.236	0.161	0.20418

## Sheet: Fig1 h
	Control
SNPH	0.700796	0.440802	0.723735	0.708392	0.699964	0.90466	0.713975	0.718194
Miro	0.768231	0.694927	0.689723	0.786363	0.632146	0.702888	0.658163	0.626672
Milton	0.591958	0.68031	0.754316	0.577027	0.502517	0.625302	0.622176	0.532035

## Sheet: Fig2 b
Sham	BCAS 7d	BCAS 14d	BCAS 28d
0.061001	0.200881	0.128651	0.143318
0.157664	0.197756	0.207621	0.190039
0.100601	0.156159	0.125551	0.110023
0.157406	0.227721	0.184445	0.090207
0.13618	0.130486	0.124537	0.084678
0.097034	0.170506	0.089717	0.151521
0.11746	0.107913	0.112771	0.081321
0.042166	0.152647	0.134702	0.150888
0.097693	0.170006	0.158427	0.161122
0.061187	0.139033	0.198359	0.141918
0.089479	0.187466	0.206501	0.130617
0.059259	0.148014	0.116371	0.156256
0.095739	0.142217	0.09193	0.10136
0.068954	0.127547	0.148232	0.13999
0.07407	0.150465	0.132889	0.121222
0.078732	0.112881	0.153974	0.119686
0.082664	0.107896	0.19585	0.18709
0.088907	0.145732	0.107081	0.103398
0.061187	0.139033	0.198359	0.141918
0.089479	0.187466	0.206501	0.130617

## Sheet: Fig2 c
Sham	BCAS 7d	BCAS 14d	BCAS 28d
5	10	20	35
0	15	25	30
10	10	15	25
0	5	20	35
0	15	25	40
0	10	30	45

## Sheet: Fig2 d
Sham	BCAS 7d	BCAS 14d	BCAS 28d
0.361649	0.383278	0.398229	0.956446
0.390042	0.477207	0.384319	0.770211
0.491521	0.455302	0.499725	0.81938
0.351181	0.452088	0.436055	0.665948
0.45768	0.433879	0.451502	0.789772
0.44737	0.500803	0.455393	0.604718
0.362752	0.505706	0.465702	0.843445
0.32827	0.684763	0.513197	0.623907
0.343688	0.548171	0.486737	0.779622
0.354302	0.618135	0.514156	0.616008
0.364261	0.417063	0.583743	0.685583
0.419432	0.466029	0.607701	0.637819
0.378825	0.722183	0.474097	0.611713
0.429456	0.535991	0.530345	0.688405
0.446297	0.414555	0.523223	0.891941
0.407412	0.434181	0.546386	0.565743
0.413947	0.451837	0.606325	0.708688
0.402903	0.511171	0.585618	0.569405
0.426431	0.566977	0.691866	0.595558
0.451163	0.550232	0.671888	0.568284
0.445873	0.504194	0.832059	0.652098
0.463012	0.48572	0.838465	0.611633
0.519116	0.525328	0.643531	0.661209
0.506858	0.54776	0.645875	0.637219
0.608074	0.693936	0.802836	0.626451
0.521873	0.659346	0.696524	0.612563
0.564798	0.657831	0.733485	0.624615
0.621735	0.676498	0.884863	0.636559
0.588535	0.626361	0.73835	0.678569
0.64538	0.765602	0.795648	0.905767
0.721042	0.716009	0.838377	0.608511
0.592338	0.912609	0.913371	0.640391
0.559772	0.892969	0.986371	0.867237
0.5752	0.734296	0.703292	0.792412
0.656472	0.792268	0.88992	0.751329
0.880212	0.728091	0.736213	0.780433
0.704278	0.945975	0.844243	0.697705
0.638635	0.756411	0.657951	0.720954
0.670084	0.981944	0.696819	0.714017
0.762115	0.650925	0.80061	0.65653
0.785153	0.786474	1.03182	0.731217
0.674092	0.735616	0.992998	0.674812
0.654227	0.709472	0.724007	0.710125
0.822949	0.849701	0.741071	0.725123
0.679337	0.677893	0.793635	0.821228
0.87781	0.90379	1.15015	0.697943
0.683017	0.865649	0.893552	0.727306
0.840111	0.675199	0.832907	0.897687
0.639949	0.608442	0.875322	0.918378
0.757314	0.645525	0.876556	0.686129
0.91974	0.78515	0.823594	0.672802
0.700951	0.658428	1.17245	0.89329
0.582883	0.751705	0.875977	0.784553
0.623836	0.849812	0.846818	0.673227
0.647945	0.9703	0.811834	0.774587
0.828997	0.730398	1.07896	0.699083
0.69623	0.902168	0.747209	0.664982
0.766429	0.669139	0.953233	0.833879
0.760226	0.890756	0.76891	0.688011
0.983217	0.796902	0.606358	0.667447
0.8035	0.785823	0.94822	0.79928
0.921304	0.832645	0.675825	0.75509
0.6884	0.816565	0.750628	0.836575
0.761811	0.895114	0.676151	0.881813
0.832395	0.858809	0.549656	0.801054
0.869571	1.11234	0.55763	0.929003
0.922115	0.837658	0.529263	1.2117
0.796656	0.961013	0.553595	0.973103
0.743263	1.03424	0.732606	0.884116
0.700854	0.80478	0.660139	1.07085
0.901375	0.783972	0.629134	0.881836
1.07887	0.728299	0.66725	0.818112
1.02458	0.739741	0.667635	0.904566
0.710785	0.782037	0.675768	1.05519
0.779361	1.01958	0.756605	0.966518
0.844242	0.900472	0.687828	1.12269
1.1888	0.977376	0.818643	1.00678
0.591607	0.8305	0.817031	1.07675
0.868465	0.649059	0.758657	1.32694
1.06002	0.953251	0.863602	1.53765

## Sheet: Fig2 f
	Sham						BCAS 7d						BCAS 14d						BCAS 28d
Caspr	0.980719	1.07306	1.15403	1.15421	1.26964	1.23501	0.85974	0.819614	0.859657	1.01077	1.02687	0.768108	0.54797	0.594102	0.686407	0.704787	0.575602	0.587932	0.359518	0.23108	0.235664	0.290692	0.238713	0.258588
Nf155	0.93799	1.18057	1.44413	1.14437	0.901787	0.917282	0.724343	0.811465	0.906685	0.823396	0.871139	0.767911	0.483129	0.55108	0.509288	0.530135	0.504069	0.525014	0.287108	0.273451	0.27733	0.309732	0.248852	0.29813
MBP	0.984546	1.08104	1.00717	1.05838	1.08697	1.6157	1.0312	1.08129	1.11469	1.14811	1.43221	1.18153	0.717388	0.813309	0.823697	0.88543	1.03636	0.749864	0.346839	0.488712	0.454464	0.531184	0.361485	0.315854

[truncated: 49 more sheets: Fig2 h, Fig2 i, Fig3 b, Fig3.c, Fig3 d, Fig3 f, Fig3 h, Fig3 i, Fig4 b, Fig4 c, Fig4 d, Fig4 f, Fig4 g, Fig4 i, Fig4 j, Fig4 k, Fig5 b, Fig5 c, Fig5 e, Fig5 g   …]
